# Supplementary material for: Unravelling population structure heterogeneity within the genome of the malaria vector Anopheles gambiae
Source: PubMed Central journal article supplement (PMC8185951; doi:10.1186/s12864-021-07722-y), 2021-06-08

tSNE plot 01

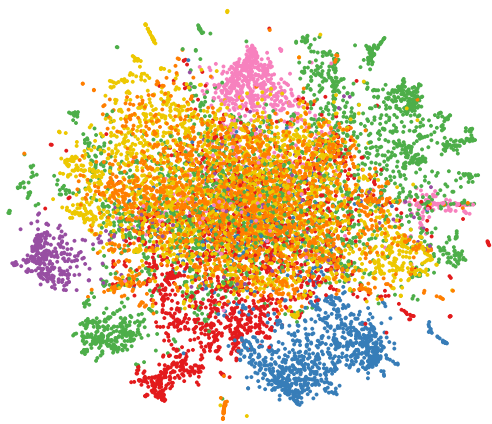

tSNE plot 02

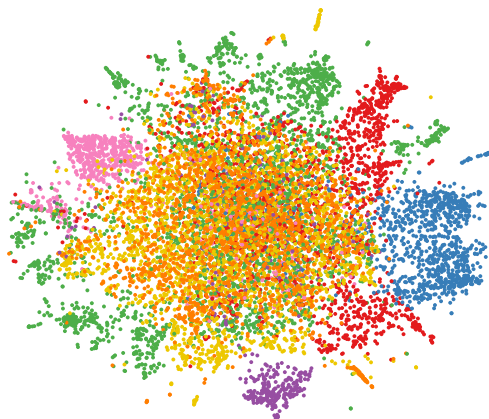

tSNE plot 03

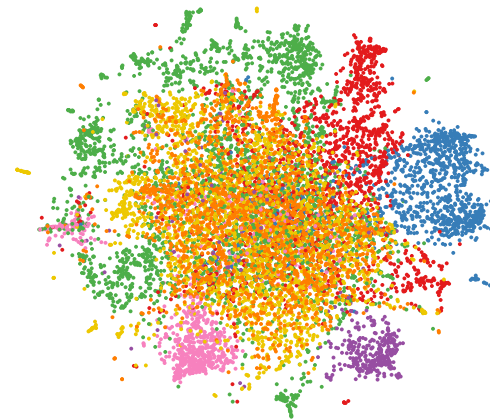

tSNE plot 04

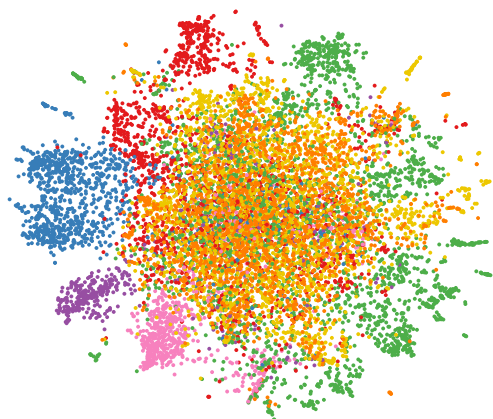

tSNE plot 05

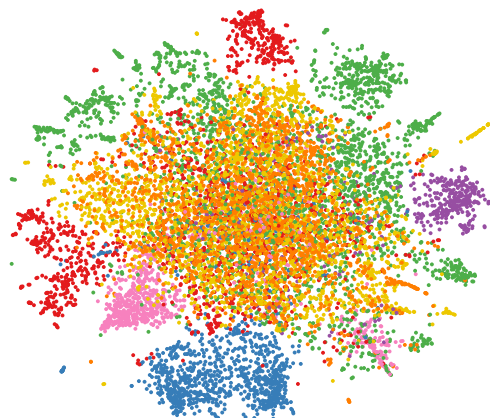

tSNE plot 06

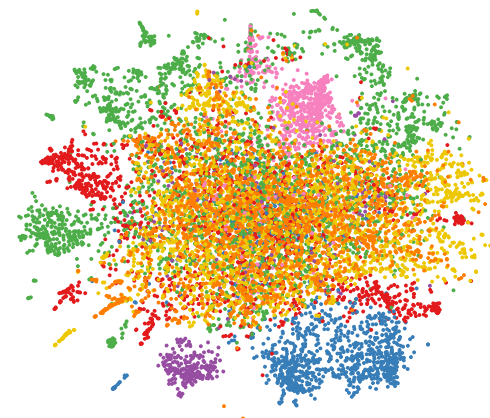

tSNE plot 07

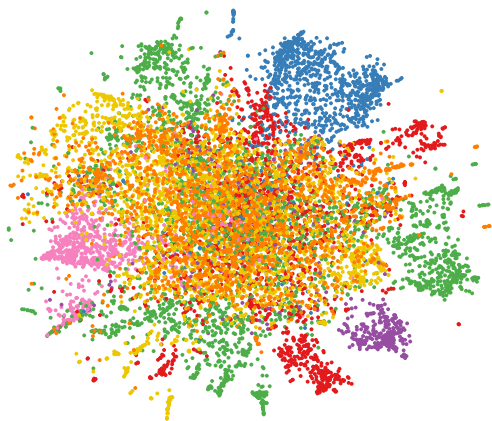

tSNE plot 08

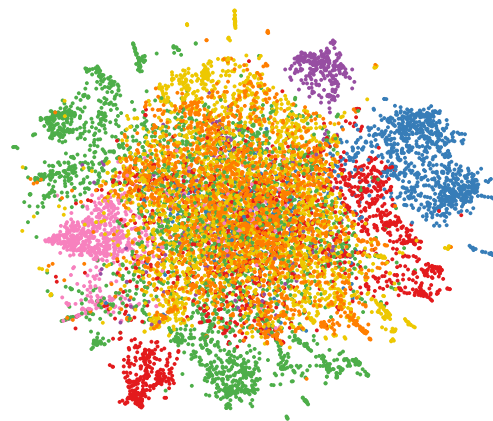

tSNE plot 09

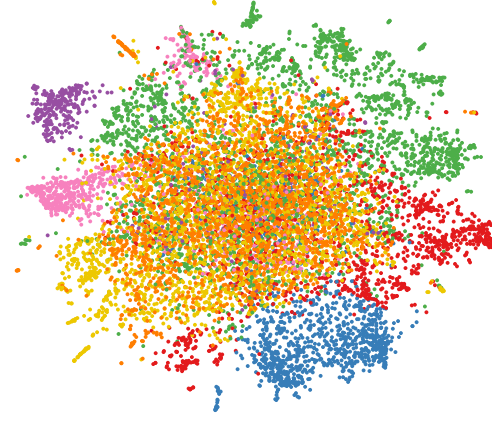

tSNE plot 10

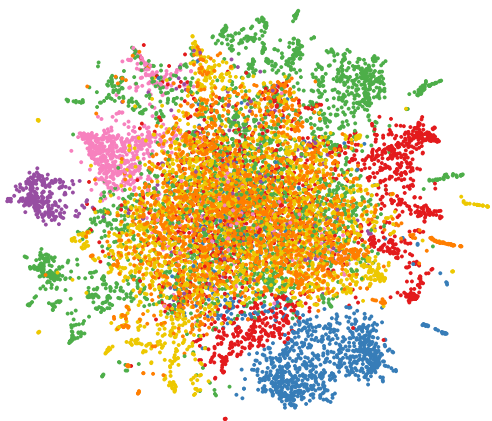

tSNE plot 11

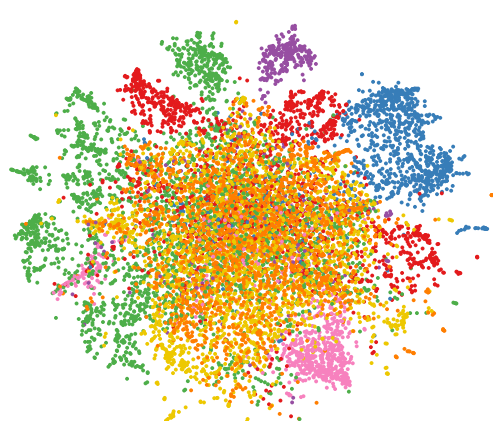

tSNE plot 12

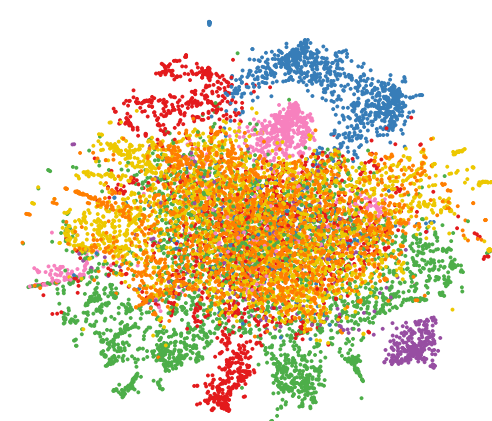

tSNE plot 13

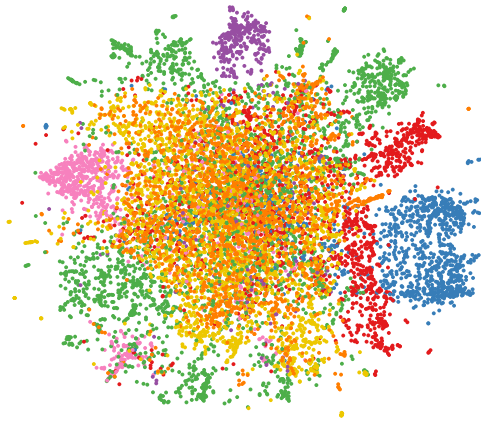

tSNE plot 14

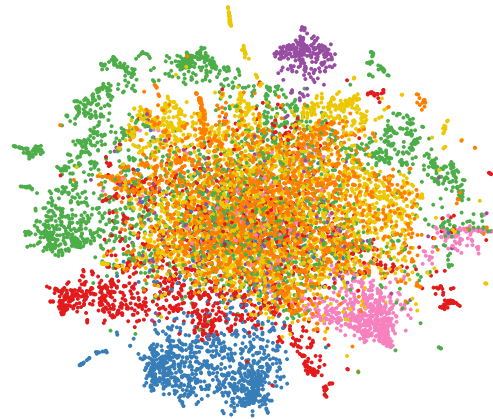

tSNE plot 15

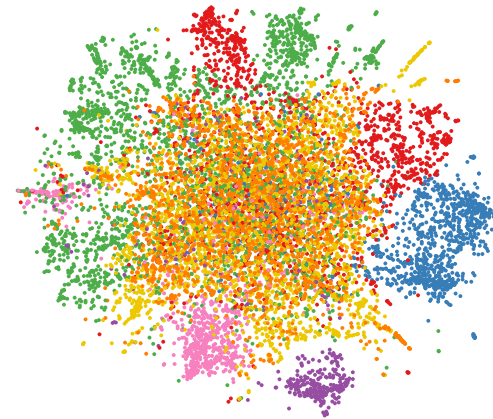

tSNE plot 16

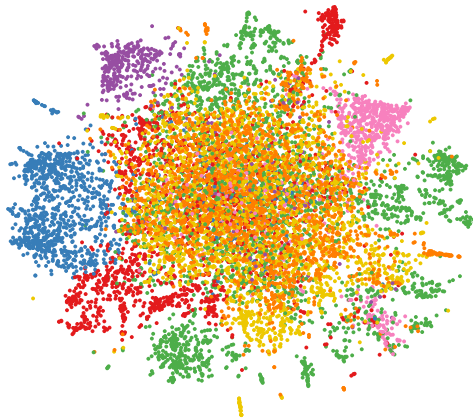

tSNE plot 17

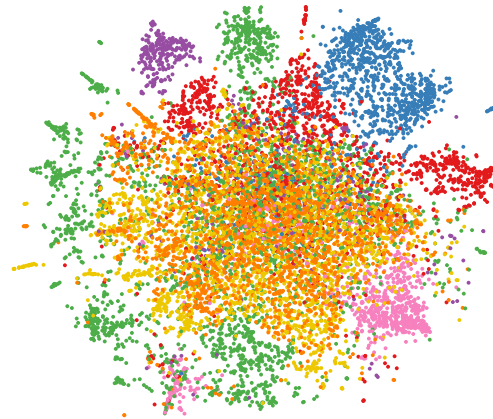

tSNE plot 18

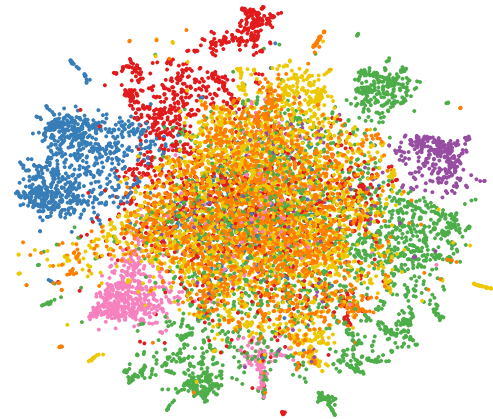

tSNE plot 19

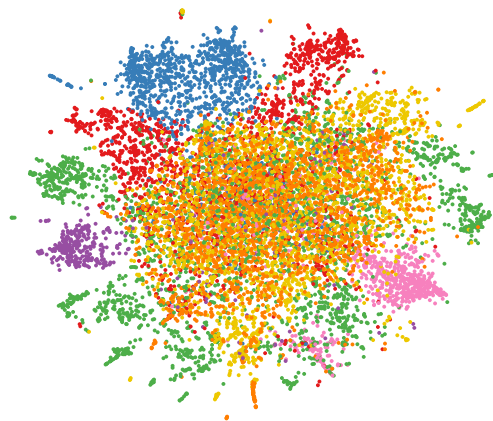

tSNE plot 20

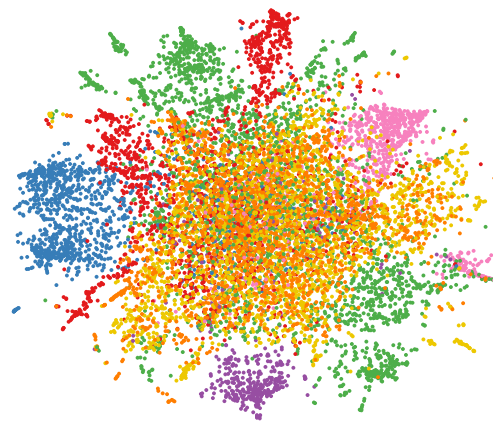

tSNE plot 21

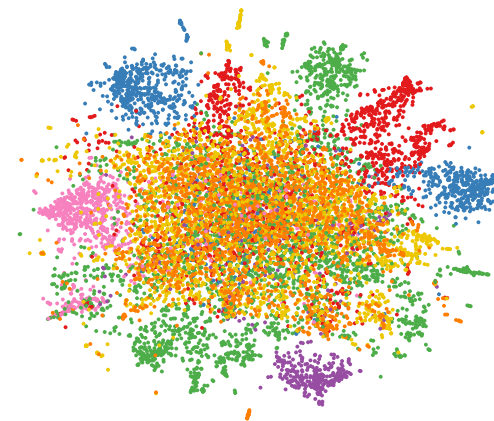

tSNE plot 22

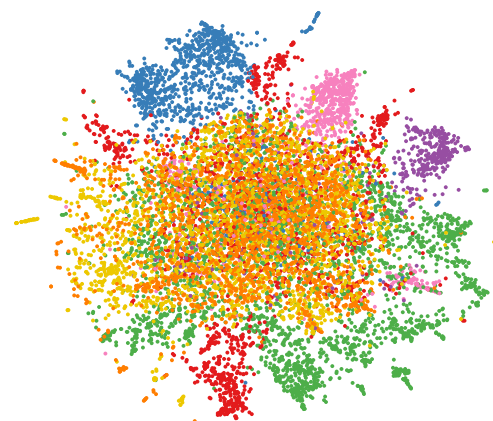

tSNE plot 23

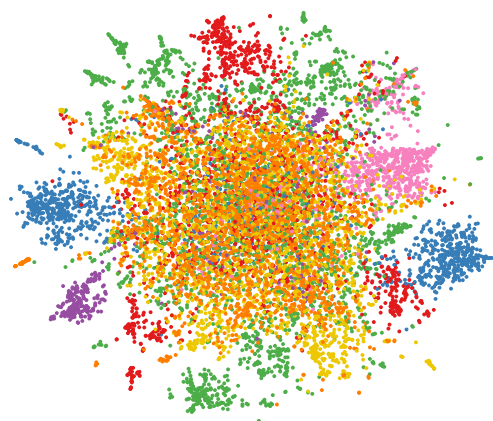

tSNE plot 24

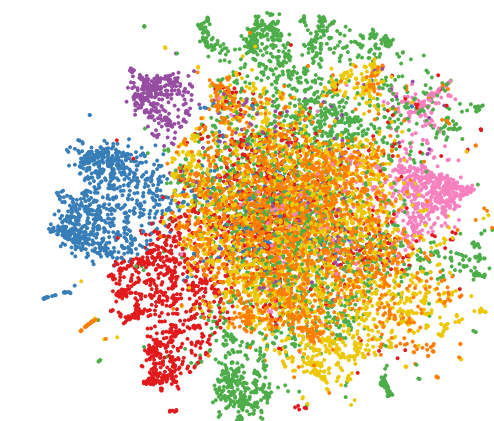

tSNE plot 25

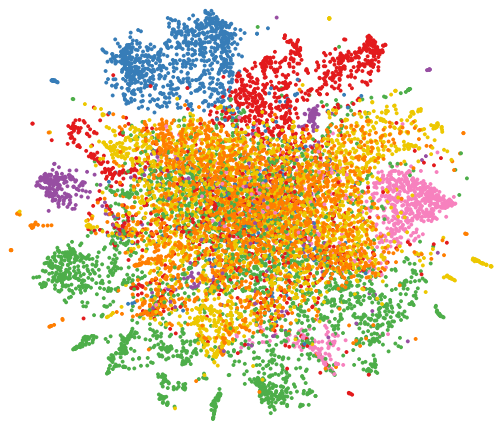

tSNE plot 26

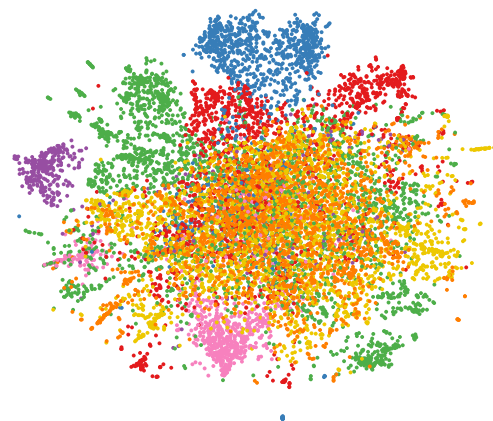

tSNE plot 27

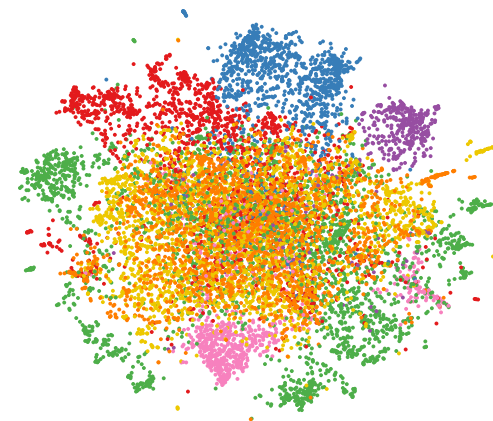

tSNE plot 28

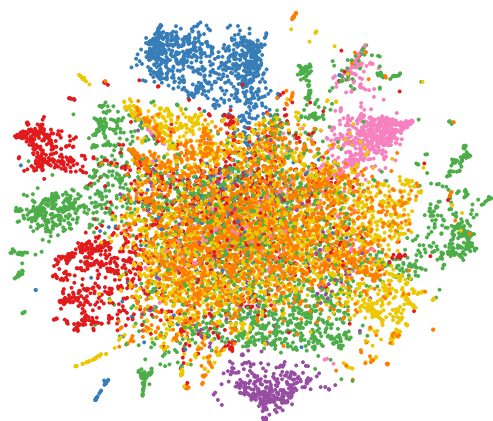

tSNE plot 29

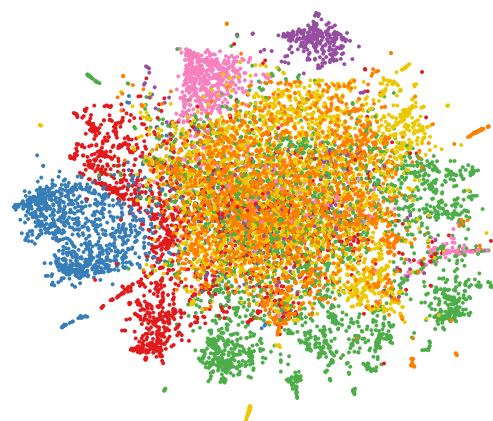

tSNE plot 30

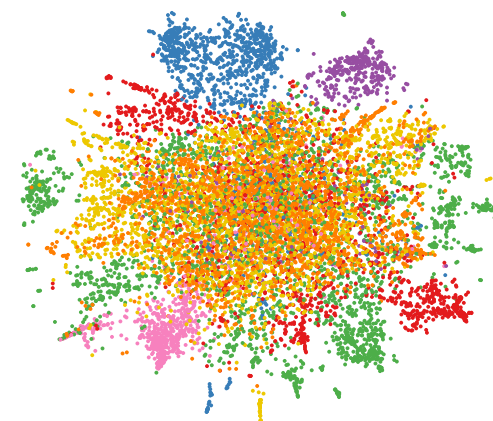

Supplement: 12864_2021_7722_MOESM1_ESM.pdf [file 12864_2021_7722_MOESM1_ESM.pdf]
