# Supplementary material for: Unravelling population structure heterogeneity within the genome of the malaria vector Anopheles gambiae
Source: PubMed Central journal article supplement (PMC8185951; doi:10.1186/s12864-021-07722-y), 2021-06-08
Supplement: 12864_2021_7722_MOESM2_ESM.pdf [file 12864_2021_7722_MOESM2_ESM.pdf]

**Unique nearest 5 neighbours**

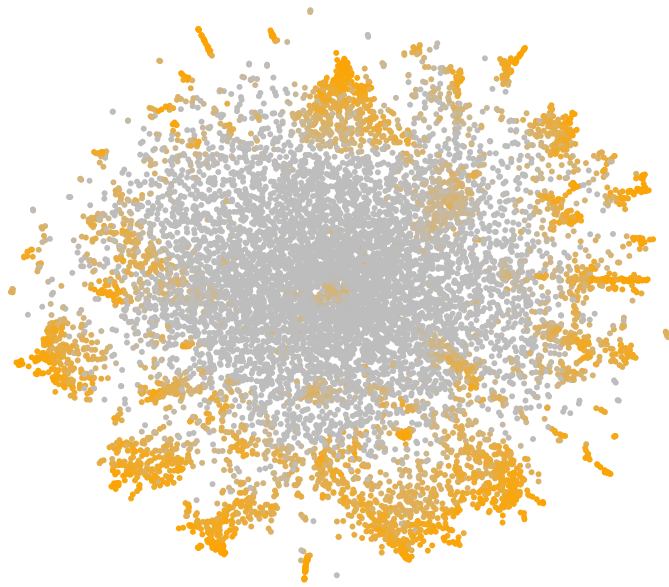

**Unique nearest 20 neighbours**

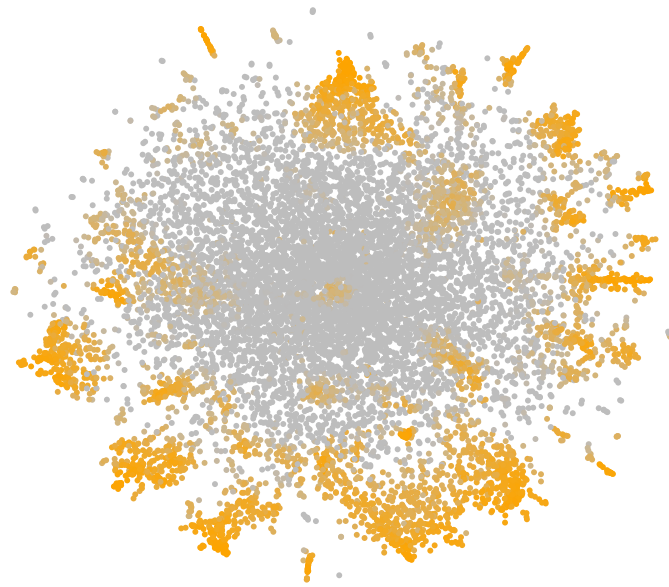

**Unique nearest 50 neighbours**

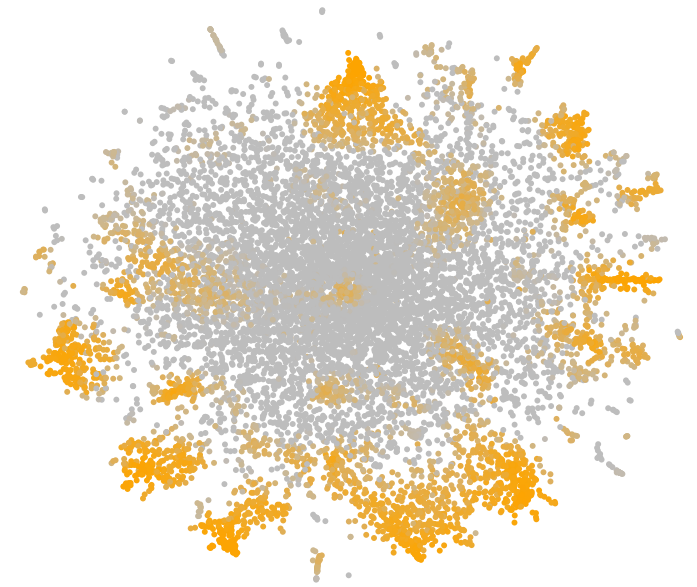

**Mean**

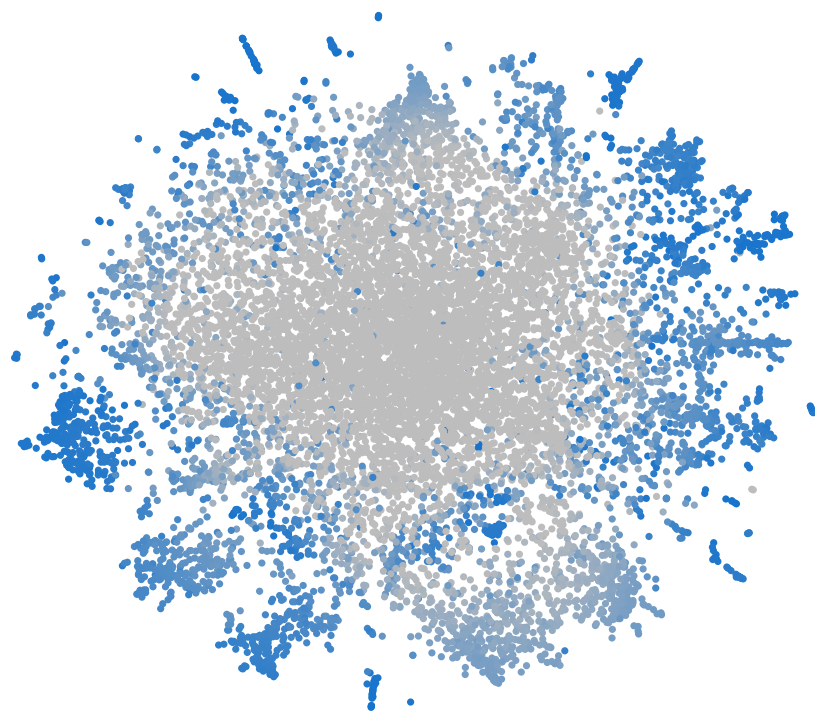

**Median**

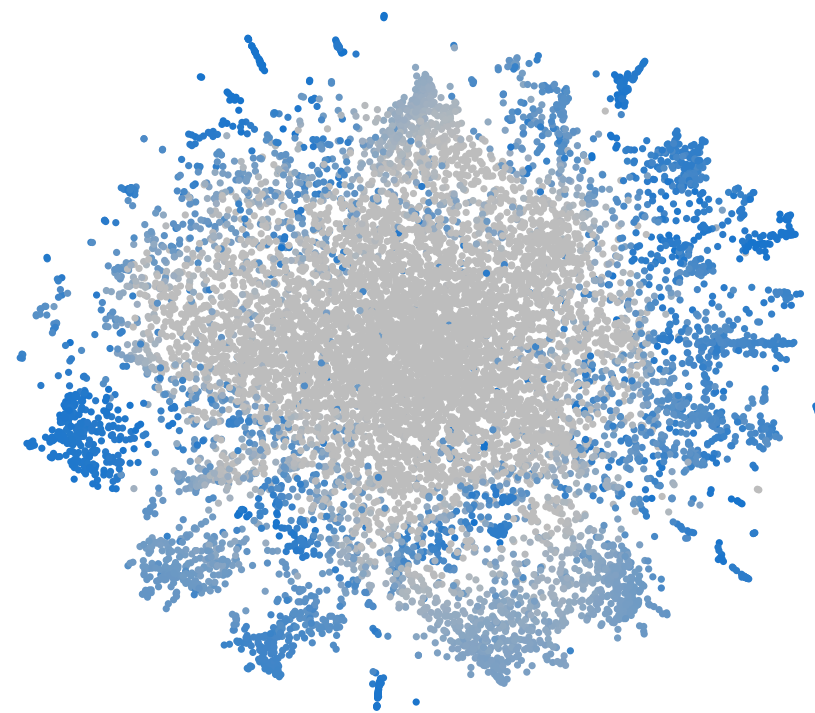

**Angola**  
*A. coluzzii*

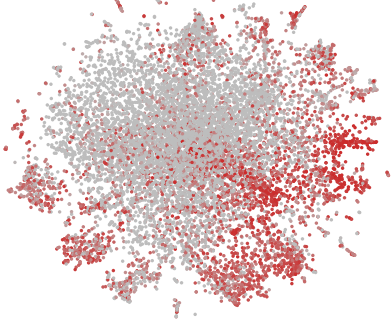

**Cameroon**  
*A. gambiae s.s.*

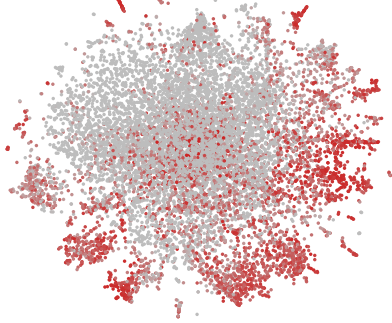

**Guinea-Bissau**  
*A. gambiae s.s.* & *A. coluzzii*

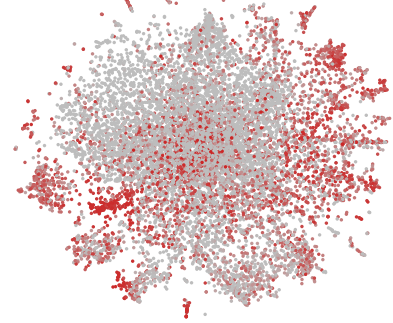

**Burkina Faso**  
*A. coluzzii*

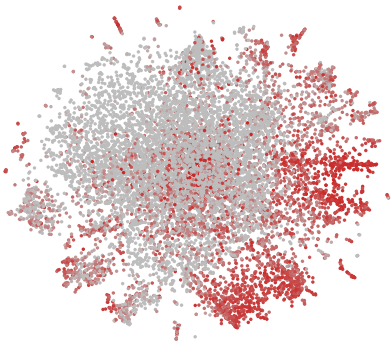

**Gabon**  
*A. gambiae s.s.*

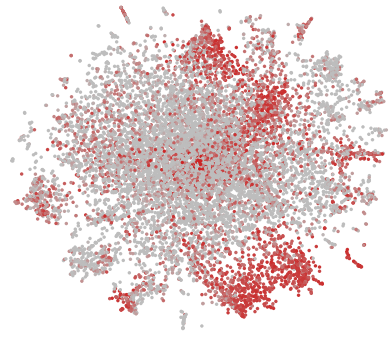

**Kenya**  
*A. gambiae s.s.*

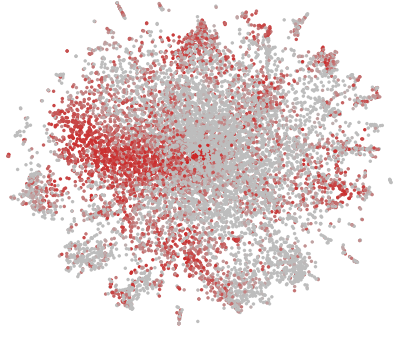

**Burkina Faso**  
*A. gambiae s.s.*

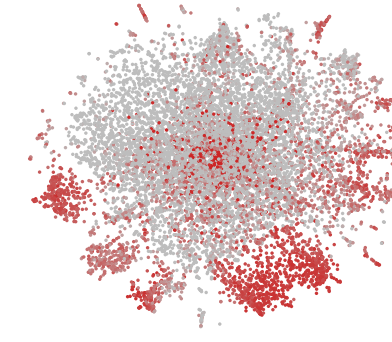

**Guinea**  
*A. gambiae s.s.*

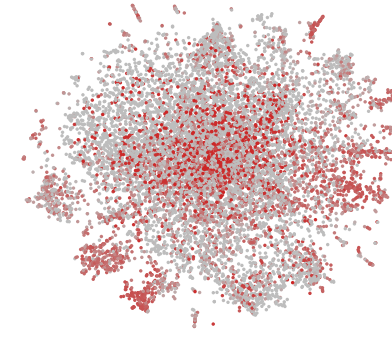

**Uganda**  
*A. gambiae s.s.*

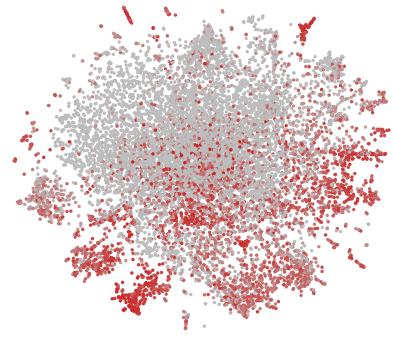

East vs. Central

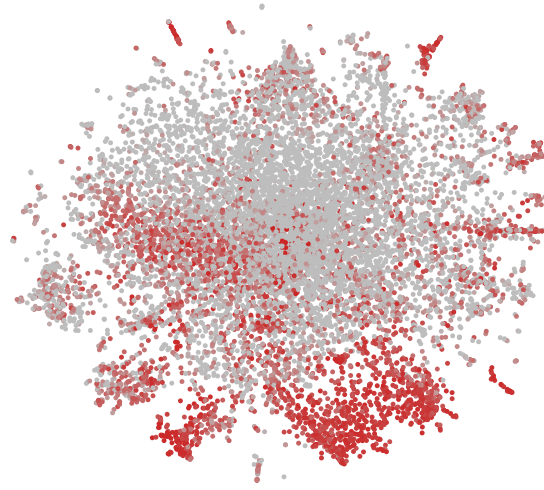

East vs. West

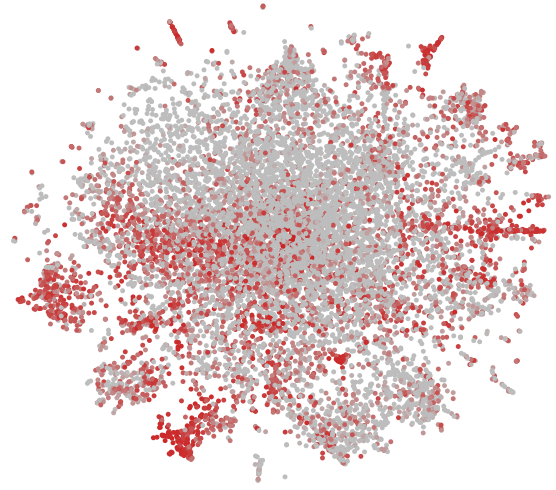

West vs. Central

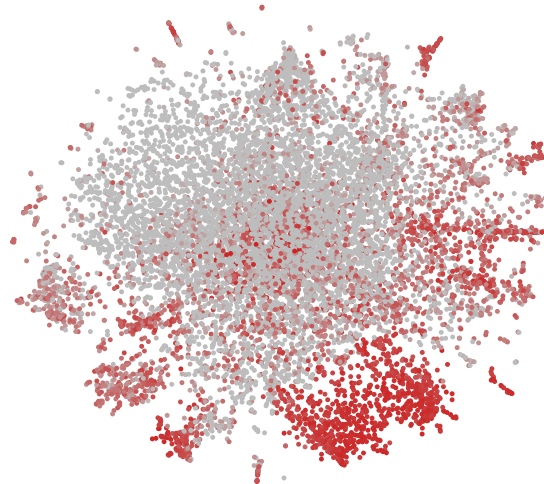

East vs. Central + West

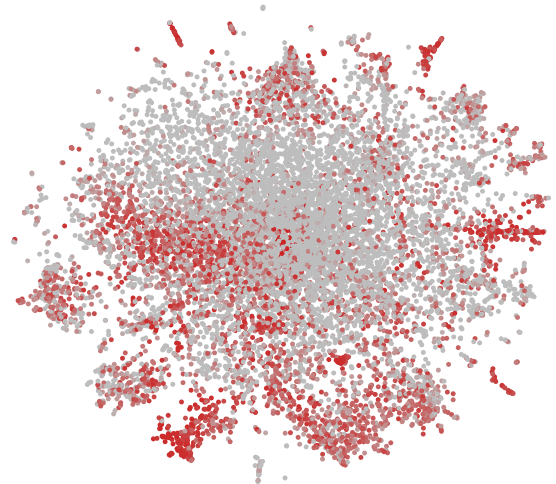

### Biological Process

### Molecular Function

### Cellular Component

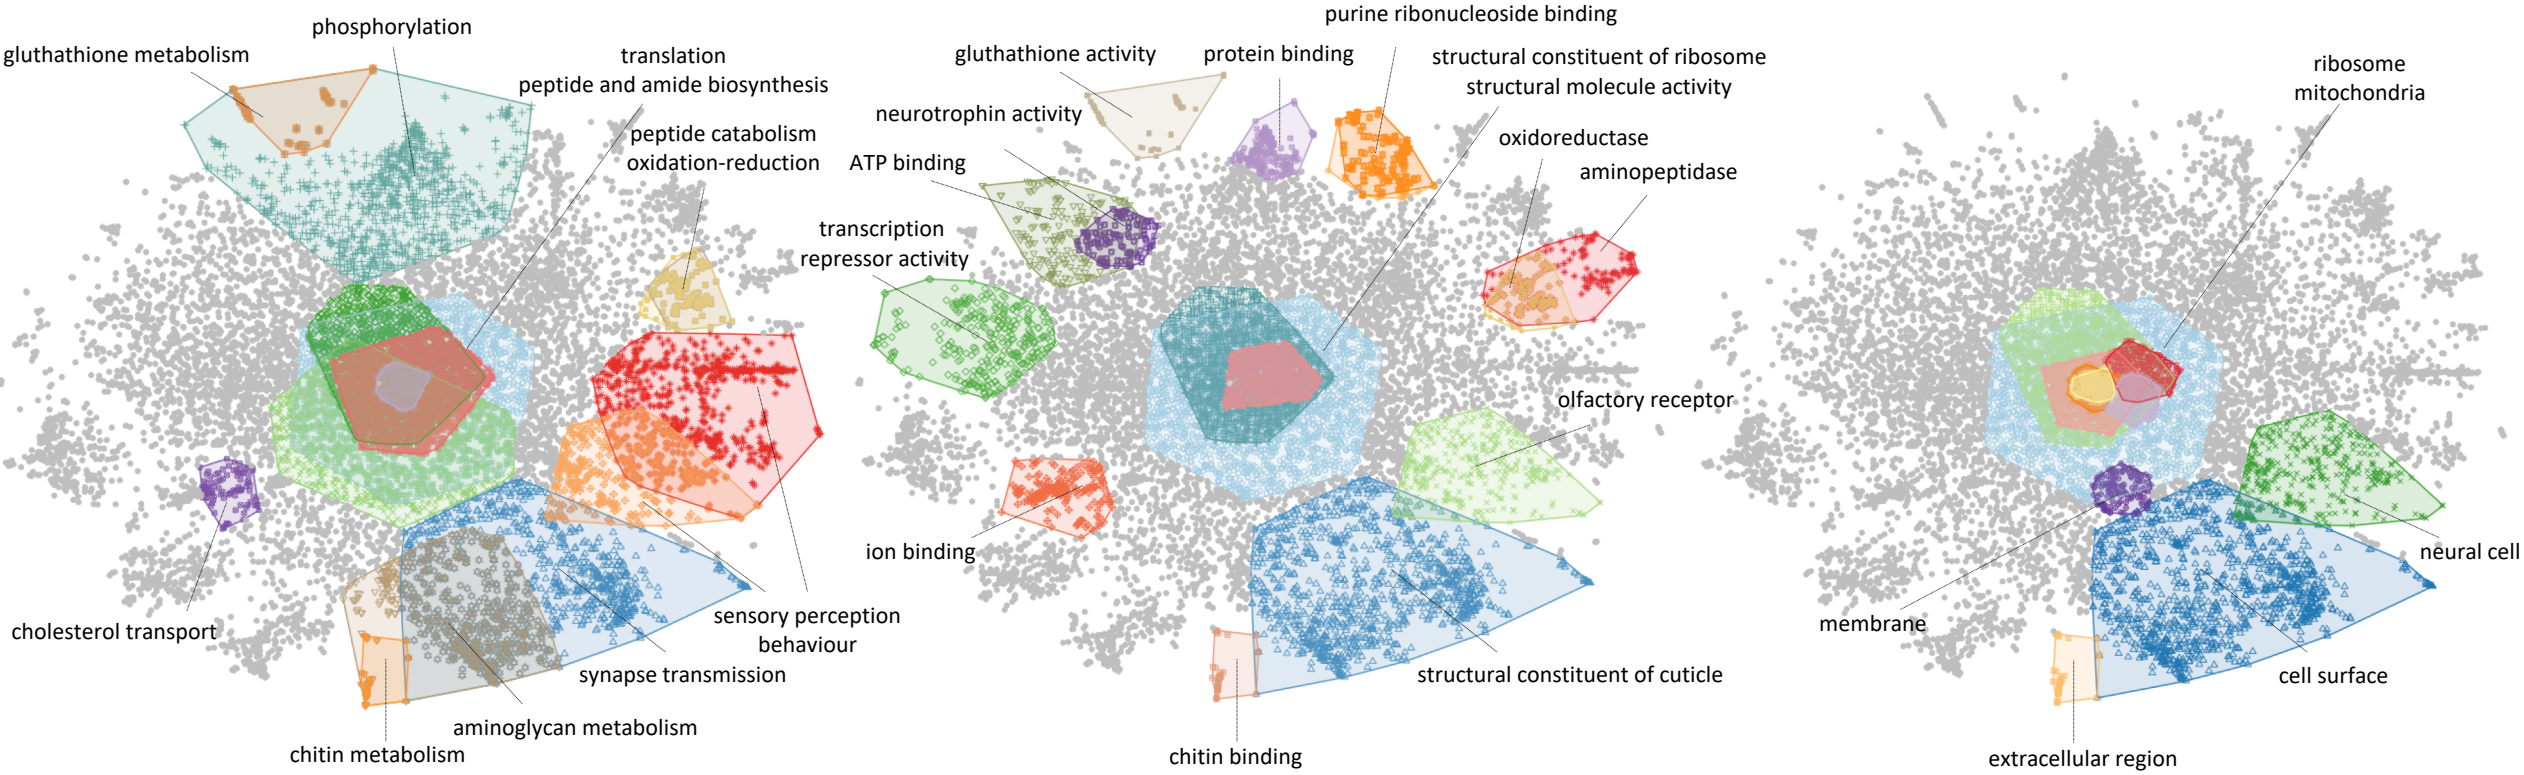

S6 Fig

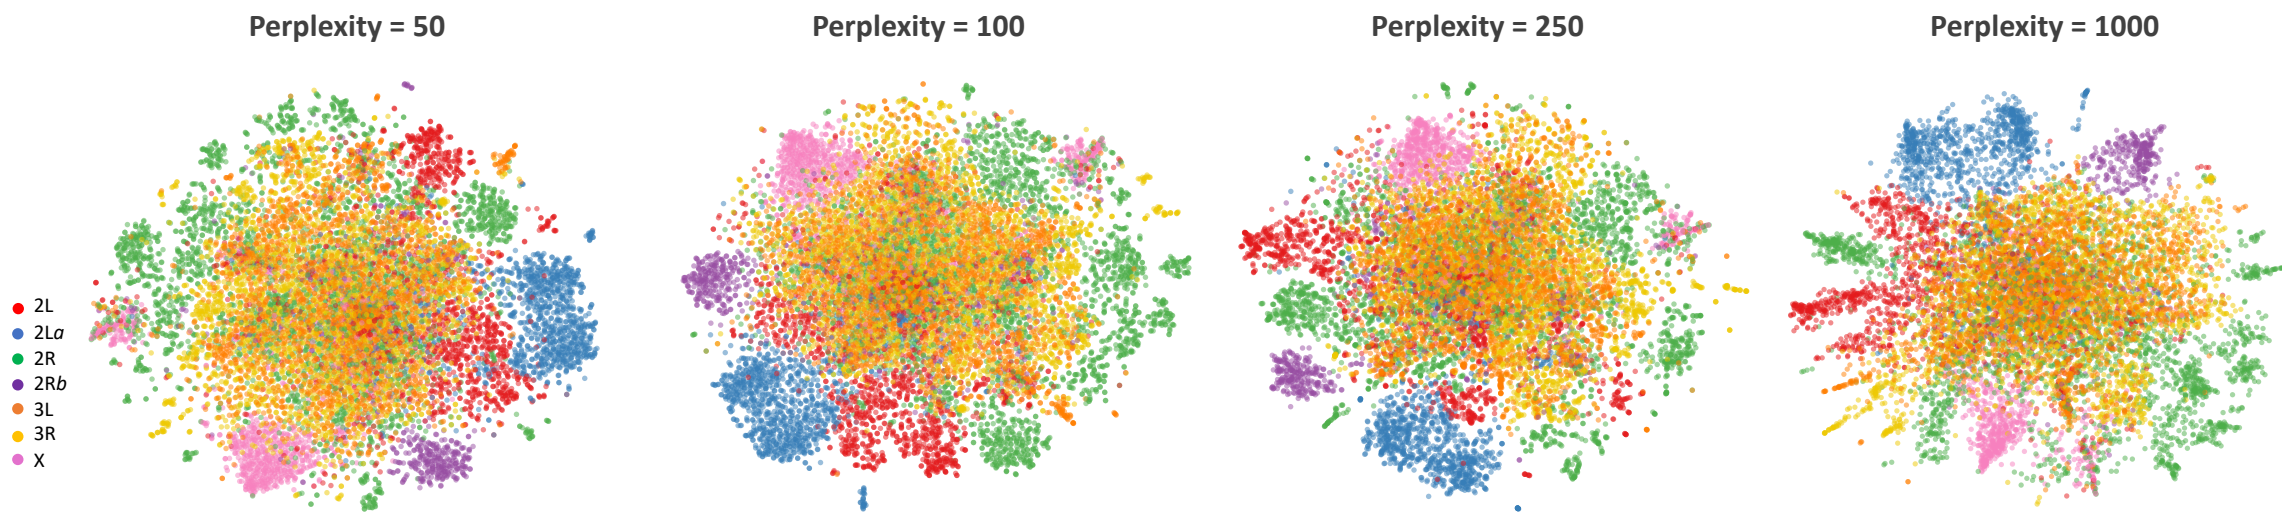

S7 Fig
